# Supplementary material for: A framework for the detection of de novo mutations in family-based sequencing data
Source: PubMed Central journal article supplement (PMC5255947; doi:10.1038/ejhg.2016.147), 2016-11-23

Method: DeNovoGear PhaseByTransmission TrioDeNovo

De novo rate prior:  $\blacklozenge$   $1.0e-4$   $\ast$   $1.0e-5$   $\blacksquare$   $1.0e-6$   $\blacktriangle$   $1.0e-7$   $\bullet$   $1.5e-8$

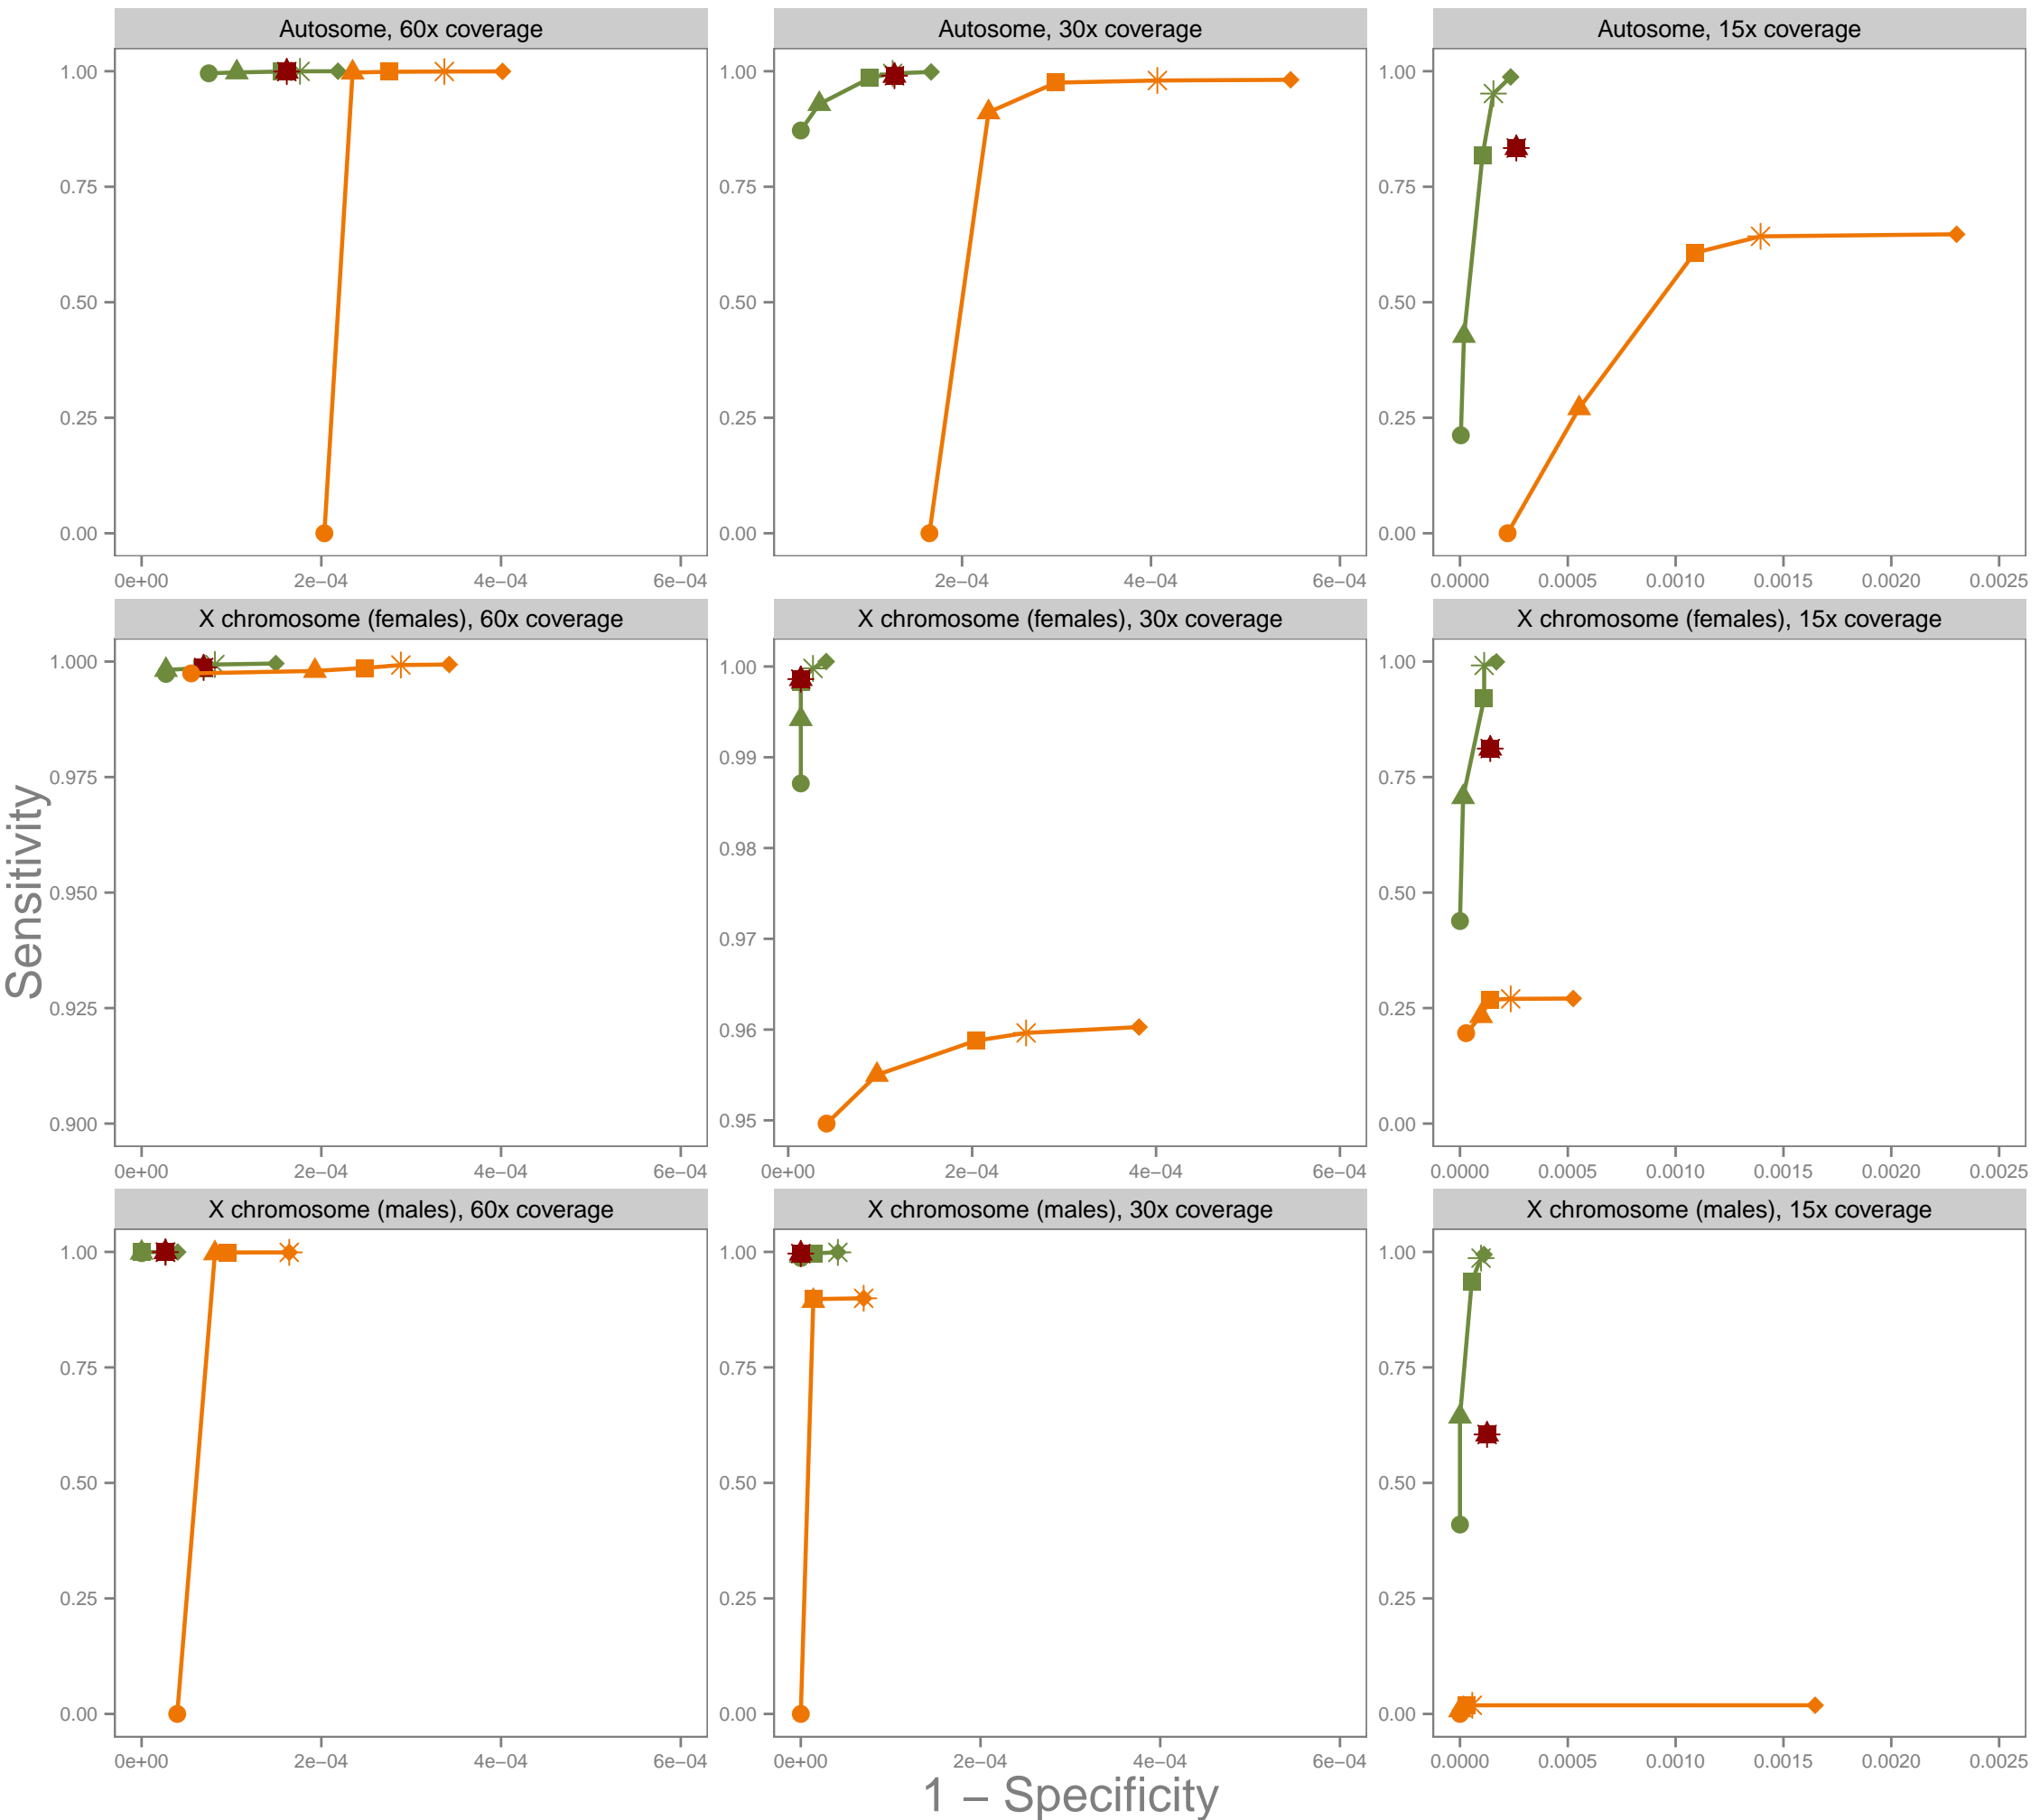

Supplement: ejhg2016147x1.pdf [file ejhg2016147x1.pdf]
