# Supplementary material for: A framework for the detection of de novo mutations in family-based sequencing data
Source: PubMed Central journal article supplement (PMC5255947; doi:10.1038/ejhg.2016.147), 2016-11-23

Method: DeNovoGear PhaseByTransmission TrioDeNovo

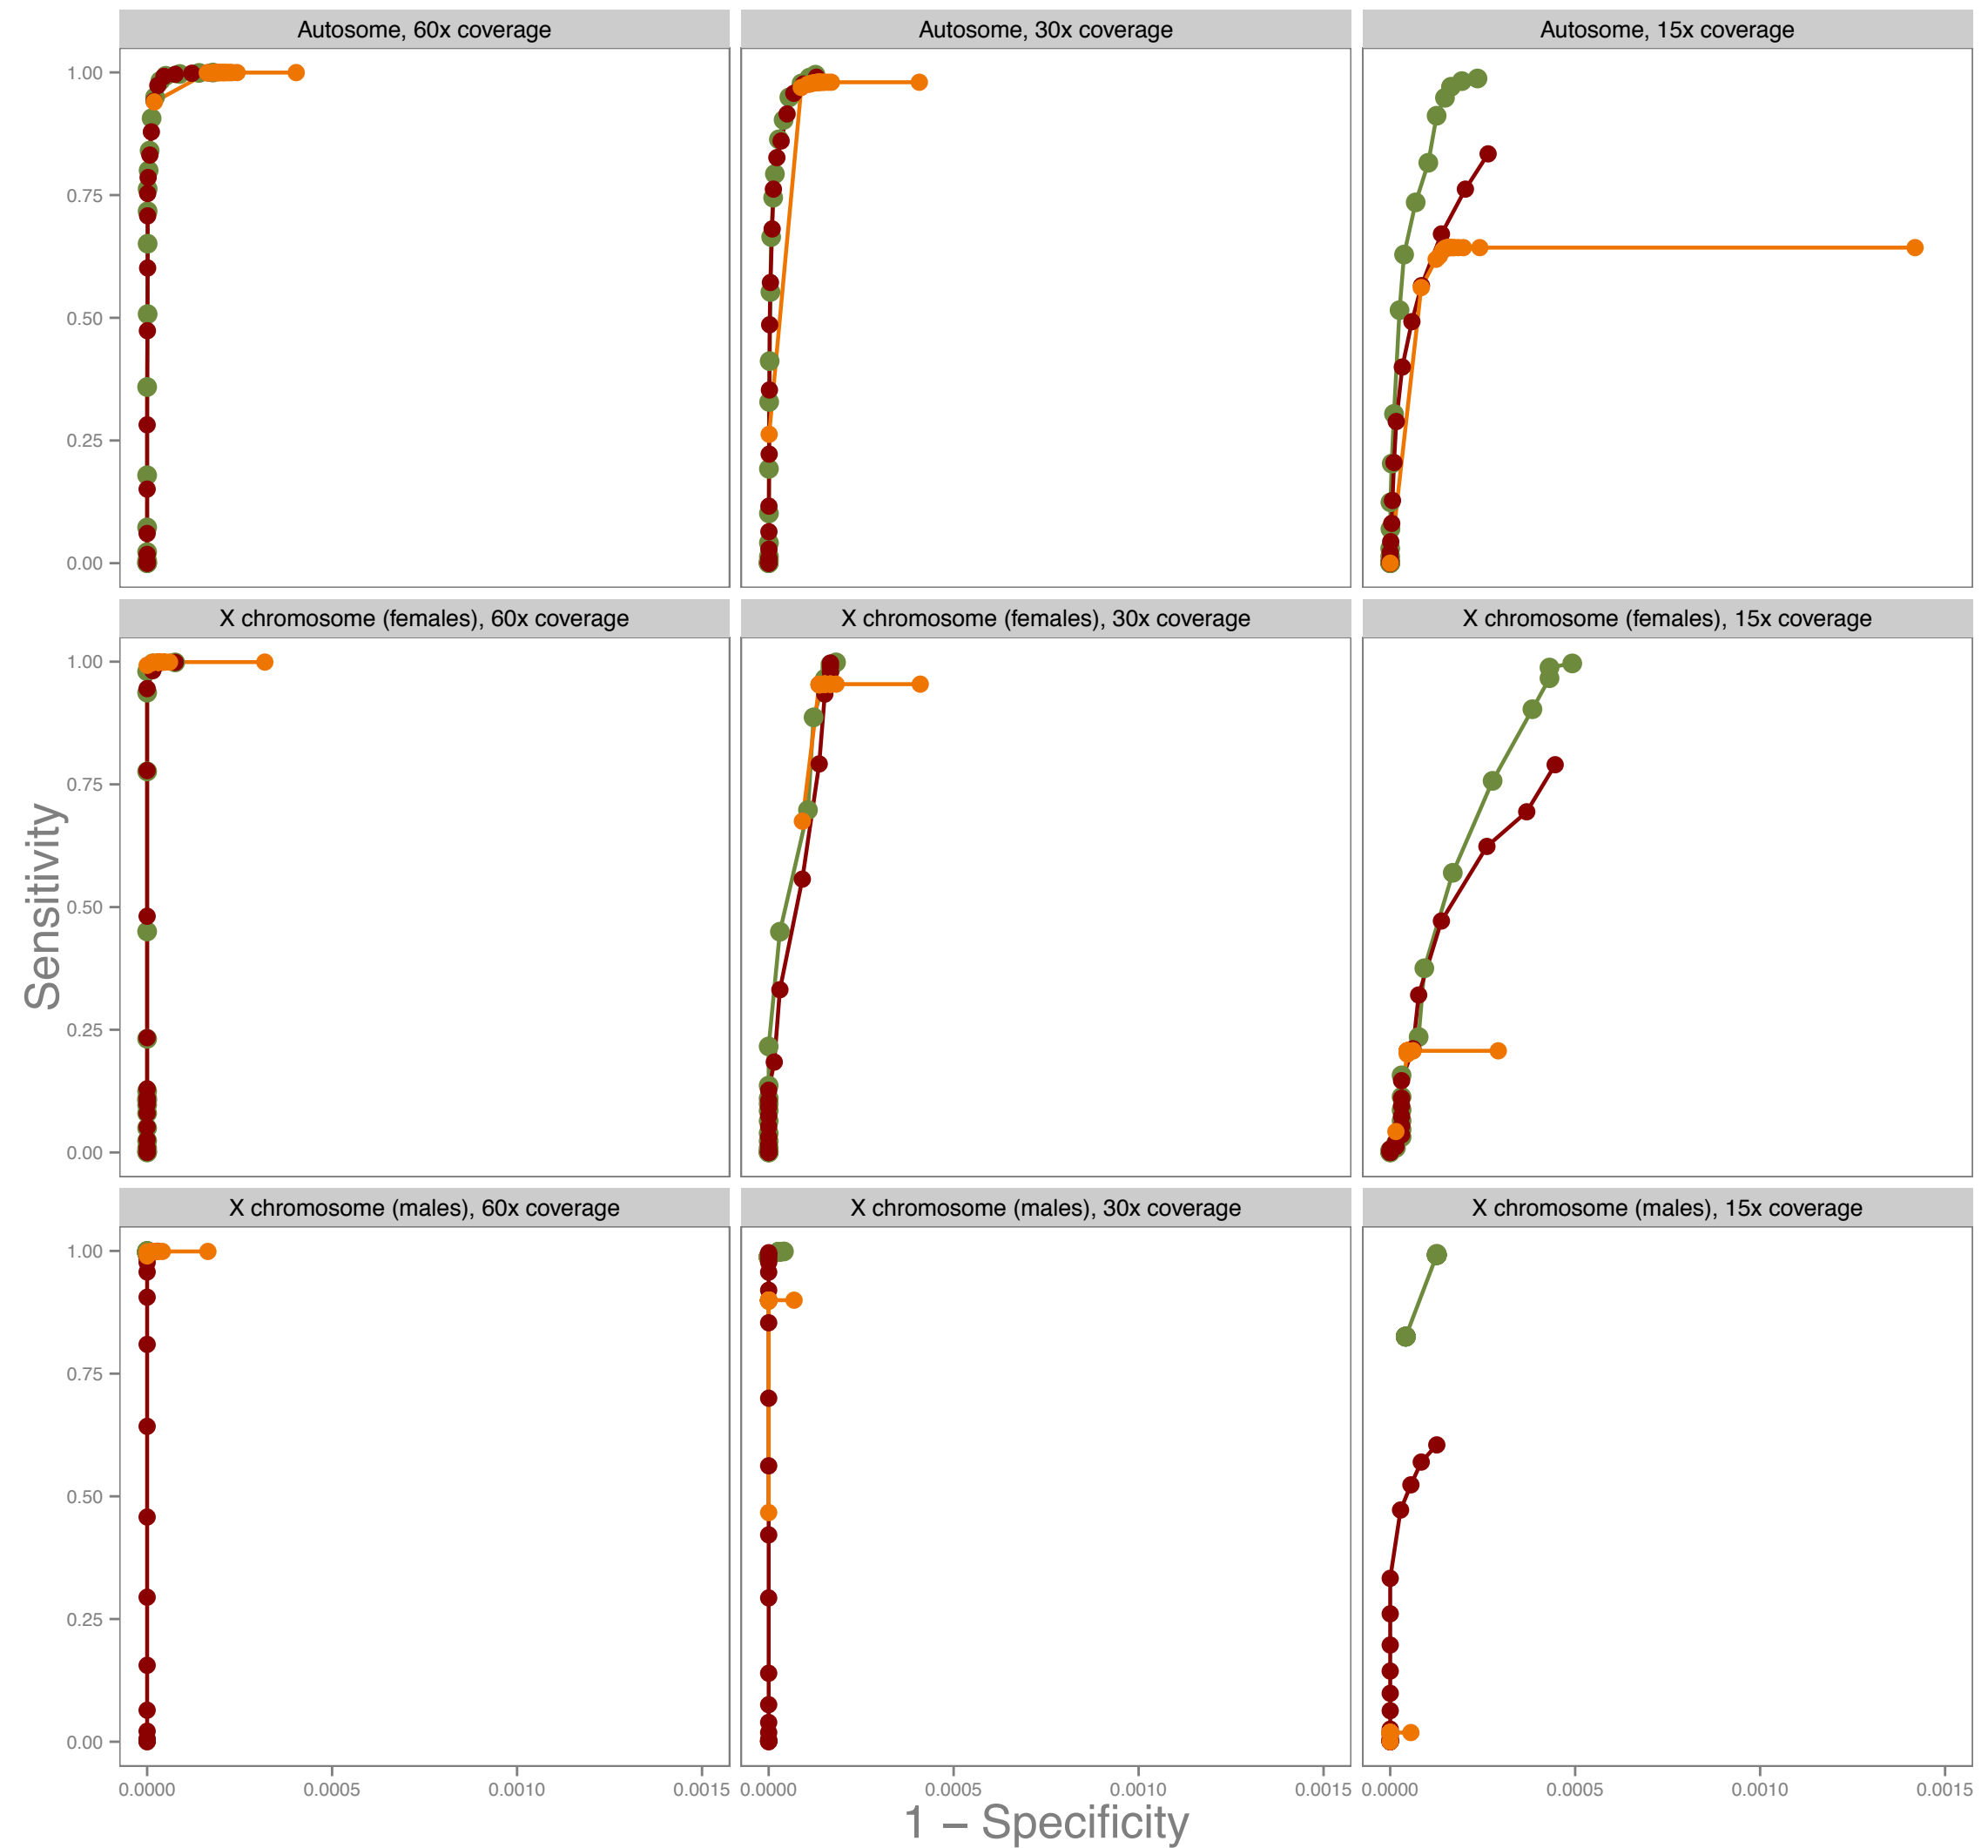

Supplement: ejhg2016147x3.pdf [file ejhg2016147x3.pdf]
